1 Epigenetic, psychological, and EEG changes after a 1-week retreat based on mindfulness and  
2 compassion for stress reduction: Study protocol of a cross-over randomized controlled trial

3  
4

5 <sup>1,2</sup>Gustavo G. Diez  
6 <sup>3</sup>Ignacio Martin-Subero  
7 <sup>4</sup>Rosaria M. Zangri  
8 <sup>3</sup>Marta Kulis  
9 <sup>5</sup>Catherine Andreu<sup>e</sup>  
10 <sup>e</sup>Ivan Blanco<sup>d</sup>  
11 <sup>6</sup>Pablo Roca<sup>a,f</sup>  
12 <sup>7</sup>Pablo Cuesta<sup>g</sup>  
13 <sup>1,8</sup>Carola García<sup>h</sup>  
14 <sup>1</sup>Jesús Garzón<sup>a</sup>  
15 <sup>1</sup>Carlos Herradón<sup>a</sup>  
16 <sup>1</sup>Miguel Riutort<sup>a</sup>  
17 <sup>9</sup>Shishir Baliyan<sup>i</sup>  
18 <sup>9</sup>César Venero<sup>i</sup>  
19 <sup>1,4,\*</sup>Carmelo Vázquez<sup>a,d,\*</sup>

20  
21 Declaration of interest: The authors declare no competing interest and are fully responsible of all  
22 data analyses and subsequent scientific reports and communications of any type.

23  
24 <sup>1</sup>Nirakara/Lab  
25 <sup>2</sup>Department of Anatomy, Histology and Neuroscience, School of Medicine, Universidad  
26 Autónoma de Madrid. PhD Program in Neuroscience.  
27 <sup>3</sup>IDIBAPS, Barcelona (Spain)  
28 <sup>4</sup>School of Psychology, Complutense University of Madrid  
29 <sup>5</sup>Polibienestar Institute, University of Valencia (Spain)  
30 <sup>6</sup>School of Psychology, Villanueva University (Madrid)  
31 <sup>7</sup>School of Medicine, Complutense University of Madrid  
32 <sup>8</sup>Mindfulness Vivendi (Madrid)  
33 <sup>9</sup>School of Psychology, Faculty of Psychology, UNED

34  
35  
36  
37  
38 \*Corresponding author  
39 [cvazquez@ucm.es](mailto:cvazquez@ucm.es)

40  
41  
42

## 1 Abstract

2 **Introduction.** The main objective of the study will be to evaluate the effects of two widely  
3 used standardized mindfulness-based programs [Mindfulness-Based Stress Reduction (MBSR) and  
4 Compassion Cultivation Training (CCT)], on epigenetic, neurobiological, psychological, and  
5 physiological variables.

6 **Methods.** The programs will be offered in an intensive retreat format in a general population  
7 sample of healthy volunteer adults. During a 7-day retreat, participants will receive MBSR and CCT  
8 in a crossover design where participants complete both programs in random order. After finishing  
9 their first 3-day training with one of the two programs, participants will be assigned to the second 3-  
10 day training with the second program.

11 The effects of the MBSR and CCT programs, and their combination, will be measured by  
12 epigenetic changes (i.e., DNA methylation biomarkers), neurobiological and psychophysiological  
13 measures (i.e., EEG resting state, EKG, respiration patterns, and diurnal cortisol slopes), self-report  
14 questionnaires belonging to different psychological domains (i.e., mindfulness, compassion, well-  
15 being, distress, and general functioning), and stress tasks (i.e., an Arithmetic Stress Test and the  
16 retrieval of negative autobiographical memories). These measures will be collected from both  
17 groups on the mornings of day 1 (pre-program), day 4 (after finishing the first program and before  
18 beginning the second program), and day 7 (post-second program). We will conduct a 3-month  
19 follow-up using only the set of self-report measures.

20 **Discussion.** This study aims to shed light on the neurobiological and psychological  
21 mechanisms linked to meditation and compassion in the general population. The protocol was  
22 registered at [clinicaltrials.gov](https://clinicaltrials.gov) (Identifier: NCT05516355; August 23, 2022).

1           **Keywords:** Retreat; Mindfulness; Compassion; Meditation; EEG; Epigenetics; Stress;  
2   Emotion regulation; autobiographical memory.

3

# 1. Introduction

In recent years there has been an outburst of scientific studies on the positive effects of mindfulness-based interventions (Mindfulness-Based Interventions, MBIs) on physical and mental health [1]. Two of the most researched programs related to the development of mindfulness and compassion are, respectively, Mindfulness-Based Stress Reduction (MBSR) [2], focused on attentional training and a non-judgmental attitude, and Compassion Cultivation Training (CTT) [3,4], more focused on the structured training of a compassionate and self-compassionate attitude. These are highly structured programs, of short duration (i.e., typically delivered in 8 weeks/16 hours format), that have shown positive effects, both for general and clinical populations, as reflected in many meta-analyses and systematic reviews [5–9], including programs using briefer formats (e.g., single-session to 2-week multi-session formats) [10].

The fundamental objective of this study is to explore the potential changes in epigenetic variables, psychological distress, well-being, brain activity, cortisol levels, and reactivity to stress, that can be observed following MBIs. The way to address this question is through an intensive intervention in a retreat format, a procedure that allows control of important variables (e.g., food, environmental conditions, etc.), and administering all the components of the standard MBSR and CCT programs in their entirety. There is already meta-analytic evidence on the positive effects of these intensive multi-day programs in healthy individuals [11]. Although there is some evidence that attentional changes might be involved in the psychological changes observed after a meditation retreat [12], there is a need to examine the mechanisms of action through which meditation practice produces its effects [13]. Most theoretical models published to date emphasize the central role of attention regulation, which is thought to underpin emotional and cognitive flexibility [14], which in turn enhances emotion regulation processes [15], and the ability to maintain non-judgmental

1 awareness of thoughts, feelings, and experiences. Theoretical models also emphasize the role of  
2 compassion and self-compassion [16] in promoting change due to MBI practices [17–21]. However,  
3 the extant evidence comparing the self-reported psychological effects of MBSR and CCT programs  
4 indicates that both programs have similar effects [22,23], although reached through different  
5 mechanisms [24].

6       Regarding the biological effects of MBIs, there is consistent meta-analytic evidence showing  
7 that they produce significant physiological changes in parameters like a reduction in oxygen  
8 consumption, blood pressure, and heart rate [25], which are contrary to those that occur during the  
9 stress response [26]. These changes have also been observed in three-day intensive meditation  
10 retreats [27]. Similarly, although the evidence for brain volumetric change is uncertain [28], there is  
11 data on changes in frontoparietal and default network connectivity during resting state tests [29,30].  
12 There is also promising evidence that intensive intervention practices, in a retreat format, are  
13 associated with significant changes in gene expression that might be potentially regulated by  
14 epigenetic mechanisms. For example, an 8-day silent guided meditation retreat can modify gene  
15 expression, in particular genes related to the immune response [31]. However, the brain  
16 mechanisms and molecular activity are not yet well understood. Along the lines of some previous  
17 research on detectable epigenetic changes in brief intensive meditation interventions aimed at  
18 reducing stress [32–36], we intend to test whether epigenetic changes are one of the mediating  
19 mechanisms in the observable psychological changes following an intervention. We will also  
20 analyze whether changes in brain connectivity (measured with EEG in resting state) and in the  
21 diurnal cortisol rhythms occur throughout the programs.

22       Although research on the comparative effects of MBSR and CCT has shown the existence of  
23 some particular mediators [24], the effects of a sequential intervention of both types of training on

1 the same individuals are not known. This sequential approach is important to evaluate whether there  
2 are additive effects of the programs and whether the order of the intervention (one more focused on  
3 attentional aspects and the other more on socio-emotional factors) can facilitate psychological and  
4 neurobiological changes. Thus, we aim to analyze the existence of differential psychobiological  
5 changes in two types of intensive psychological programs (MBSR and CCT), and whether the  
6 sequence of the programs (using a cross-over design), does significantly affect the results.

7 As, to the best of our knowledge, this is the first study using a sequential design with two  
8 intensive meditation modalities, it is difficult to formulate specific hypotheses regarding the  
9 separate and combined effects of the MBSR and CCT programs on the selected outcomes. Thus,  
10 considering the two MBIs jointly, we expect that both programs will significantly: a) modify the  
11 DNA methylation and expression levels of specific genes and a reduction of the DNA methylation-  
12 based biological clock; b) reduce participants' levels of psychological distress while increasing their  
13 levels of psychological functioning (i.e., mindfulness, compassion, emotion regulation, and well-  
14 being); c) change the EEG spectral profile of the resting state brain activity (i.e., changes in the  
15 balance between Alpha (8-14 Hz) and Theta (4-8 Hz) frequency bands and, regarding the  
16 organization of the brain functional networks, a modulation of the difference between the activation  
17 of the default mode network and the one corresponding to the salience network); d) alter awakening  
18 and bedtime cortisol levels leading to a steeper Diurnal Cortisol Slope (DCS); e) improve the  
19 efficacy of mood regulation following a negative mood induction (using an autobiographical  
20 memory task); f) reduce participants' reactivity in an objective experimental stress test (i.e.,  
21 Arithmetic Stress Test). In addition, given the multidisciplinary nature of the present project, we  
22 intend to provide a comprehensive view of potential changes in various areas of biological and  
23 psychological functioning and their interrelationships.

1 In general, we expect an overall pattern of results in which changes will be significantly  
2 higher for the combined effects of both MBIs than for each program separately. Moreover, based on  
3 previous literature comparing standard MBSR and CCT programs [24], we expect no major  
4 differences in primary outcomes between both programs, although the mechanisms of change may  
5 be different; in general, changes in MBSR will be mediated by cognitive variables (e.g.,  
6 mindfulness) whereas changes in CCT will be mediated by socio-emotional variables (e.g.,  
7 compassion). We also expect that the self-reported psychological changes associated with the MBIs  
8 will remain 3 months after the programs.

9

## 10 **2. Methods**

### 11 **2.1 Study design overview**

12 Participants will be randomly assigned to two groups starting with MBSR or CCT. A  
13 stratified randomization procedure, using the Research Randomizer Program  
14 (<https://www.randomizer.org>), performed by the principal investigator (CV), will be used to  
15 maintain the same percentage of male and female participants in each group. Participants from both  
16 groups will take part in a 7-day retreat, including training in both meditation-based practices. Using  
17 a cross-over design, the participants will undergo their second training during the last three days of  
18 the retreat. Biological and psychological measures will be collected from both groups in the  
19 mornings of day 1 (before beginning the programs), day 4 (after the first program and before the  
20 beginning of the second program), and day 7 (at the end of the program). Also, before going to bed,  
21 participants will be given a short questionnaire with eight questions about their general functioning  
22 during the day and their satisfaction with the progress of the program. Furthermore, a 3-month

1 follow-up assessment will be conducted in both groups only for psychological questionnaires. (See  
2 figure 1).

3 -----

4 **Figure 1: Cross-over design**

5 -----

6 **2.2 Participants: Recruitment and selection**

7 Individuals from the general population will be recruited through the Nirakara-Lab website, a  
8 university-associated research center specializing in Mindfulness and Compassion-Based programs.  
9 Participants will be invited to join the study on the university's official website offering the MBSR  
10 and CCT programs ([www.nirakara.org](http://www.nirakara.org)). To control for potential self-selection biases, which is a  
11 common shortcoming of MBIs research [37–39], there will be statistical controls on key issues such  
12 as years and type of previous meditation practice, if any, sociodemographic information, and mental  
13 health status. Individuals interested in participating in the retreat will be interviewed by members of  
14 the research team (RZ and CA) to screen their suitability for the study. Inclusion criteria will be  
15 being a healthy adult between 25 and 65 years old who is interested in meditation and compassion  
16 techniques to regulate their mood and stress. Exclusion criteria include having a current or past self-  
17 reported diagnosable serious or disabling mental disorder (in particular, PTSD, major depression,  
18 psychotic disorders, and/ or use of alcohol or drugs disorders) or having a current or past (i.e., less  
19 than 5 years ago) medical or physical condition that may affect the immune system (i.e.,  
20 autoimmune disease, chronic severe infections, HIV, cancer), pregnancy, serious chronic illnesses,  
21 as well as the consumption of psychotropic drugs. Individuals with current habits (i.e., smoking,  
22 alcoholism, substance abuse) or taking specific medications (e.g., corticoids) that might affect the



1 immune system are also excluded. Also, individuals planning to travel from a different time zone or  
2 long-travel times will be excluded as that might affect the immune system.

3       The screening procedure will be conducted as follows: 1) First contact will be made through  
4 an online form expressing interest and commitment to participating in the study, where participants  
5 will be provided with some information on the retreat (date, location, and program characteristics)  
6 and will complete information on demographics, physical and psychological health history, and  
7 meditation experience. A waiting list will be formed for participants who did not sign up in time  
8 and wished to be considered in case a place became available. An expected final sample of 52  
9 people will take part in the retreat being randomised to the MBSR training or CCT training for the  
10 first part of the retreat. All participants will complete the first arm of the study and then will be  
11 allocated to the opposite condition for the second study arm (following a cross-over design).

12 Participants will pay the cost of the retreat (i.e., meals and accommodation only) and will not  
13 receive any economic compensation for their contribution to the study. Participation requires  
14 informed consent, provided by the principal investigator (PI) or authorized full members of the  
15 research team, in which all the conditions of the study are reported, following all the stipulations of  
16 the WMA Declaration of Helsinki for human studies. The models used in the study will be available  
17 upon request. In case of any adverse effect, which is very unlikely in this type of interventions,  
18 participants may leave the study at any time without having to offer any explanation and without  
19 any kind of penalty. Furthermore, the team will facilitate any kind of help requested by participants  
20 during the retreat. The collection of biological information is innocuous, and blood and saliva  
21 samples will be collected by nursing professionals.

22 The study has been approved by the University Ethics Committee (Ref. 22/449-E, July 2022) and  
23 has been pre-registered (clinicaltrials.gov, Identifier: #NCT (hidden for review)). Any modification

1 to the protocol will be reported both to the Ethics Committee and the trial registration site.  
2 Participants will be informed in advance of the results of the study to be published in scientific  
3 journals.

4

## 5 **2.3 Sample size**

6 According to G\*Power software, we need 21 participants per group to obtain a power of .95  
7 to detect a mean effect size of .37 (based on a meta-analysis on mindfulness retreats, [11]), with an  
8 alpha standard error probability of .05. In anticipation that there may be last-minute dropouts in pre-  
9 registrants or incomplete data in the sample collection or the analysis of the planned psychological  
10 or biological data, we have increased the sample by an additional 20% to 26 participants for each  
11 condition (52 in total). This sample size further corresponds to the average size of standard  
12 meditation retreats [11] and in studies of brain activity in meditators [29,30].

## 13 **2.4 Components and structure of the programs**

14 Each program will comprise standard MBSR and CCT protocols in an intensive format to fit a  
15 retreat mode. Throughout the retreat, participants will be in silence, not talking to each other or  
16 using electronic devices. Each program will last 3 days in total, and all participants will go through  
17 both programs. On each retreat day, participants will spend a total of 4.25 hours of sitting  
18 meditation, 2 hours of walking meditation, 2 hours of explanations and discussing with the  
19 instructors, doubts or problems related to the practices and 1 hour of mindful body movements  
20 (yoga/qigong). In total, participants will have 9 hours of practice each day. (A description with the  
21 contents of the programs is shown in Table 1).

22

#### 2.4.1 *Mindfulness-Based Stress Reduction (MBSR)*

The MBSR is an 8-week standardized program [40] that aims to cultivate awareness by paying attention to the present moment with acceptance and a non-judgmental disposition.

Training is delivered by two certified instructors at the University of Massachusetts Centre for Mindfulness ([https:// www.umassmed.edu/cfm/](https://www.umassmed.edu/cfm/)) and Mindfulness Center at Brown University (<https://www.brown.edu/public-health/mindfulness/home>).

#### 2.4.2 *Compassion Cultivation Training (CCT)*

The CCT is an 8-week standardized program [3,41] aimed at cultivating compassion and empathy toward oneself and others, consisting of daily formal and informal practices.

Training is delivered by two certified instructors at the Compassion Institute and Nirakara-Lab.

-----

Table 1: Description of the main components

-----

### 2.5 Study outcomes

(See Table 2 for all measures and time points).

#### 2.5.1 *Epigenetic changes*

Samples of peripheral blood will be obtained and processed in situ, during the retreat. Participants' blood samples will be collected in two standard tubes (10ml each) that contain EDTA as an anticoagulant. Blood samples will be processed immediately using the standardized Ficoll gradient

1 centrifugation protocol to isolate mononuclear cells. These cells are cryopreserved directly (with  
2 10% DMSO culture medium) and stored appropriately (in a -80 C freezer for short periods and  
3 liquid nitrogen for longer storage). Nucleic acids will be extracted in the laboratory of the  
4 Biomedical Epigenetics group, IDIBAPS (Barcelona), using DNA and RNA extraction kits. Once  
5 the nucleic acids are obtained, they will be stored in suitable freezers (-20 or -80°C) until their use  
6 for molecular profiling techniques, such as DNA methylation arrays (Infinium Methylation EPIC  
7 Bead Chip from Illumina, herein called “EPIC methylation arrays”), and gene expression by  
8 massive RNA sequencing (RNA-seq).

## 9 **2.5.2 Psychological measures**

10 **a) Self-report measures.** These measures, commonly used in previous MBI studies [22],  
11 cover selected psychological distress and functioning constructs (i.e., stress, anxiety,  
12 depression, mindfulness, compassion, well-being, and emotion regulation) and all will be  
13 administered via Qualtrics with individualized links:

- 14 1. *Psychological distress.* Depression Anxiety Stress Scales (DASS-21) [42].
- 15 2. *Psychological well-being.* Satisfaction with Life Scale (SWLS) [43].
- 16 3. *Mindfulness.* State Mindfulness Scale (SMS) [44].
- 17 4. *Anxiety.* State-Trait Anxiety Inventory (STAI-20) (Spielberger et al., 1983).
- 18 5. *Somatic Symptoms.* Patient Health Questionnaire (PHQ-15) [45].
- 19 6. *Sleep difficulties.* DSM-5 sleep difficulties [46].
- 20 7. *Compassion.* State self-compassion State Self-compassion Scale (SSCS) [47].
- 21 8. *Fear of Compassion.* The Yourself subscale from the Fear of Compassion Scale [48].
- 22 9. *Emotion Regulation.* State Difficulties in Emotion Regulation (S-DERS-21) [49].
- 23 10. *Current mood.* Positive and Negative Affect Schedules (PANAS) [50].



1 made them feel negative emotions such as shame, guilt, and sadness. Participants  
2 will be asked to assign personal keywords (e.g., ‘traffic accident’), for each of the  
3 three memories, synthesizing the event. Each of the three negative events will be  
4 randomly assigned to the three respective assessment days so that participants  
5 were given the corresponding “keywords” when they begin the retrieval task.  
6 Participants are given 10 minutes to write down the memory as specifically as  
7 possible. Pre-post changes in their sadness, happiness, anxiety, serenity, shame,  
8 and guilt affect states will be assessed using a 0 (nothing) to 100 (very much)  
9 visual analogue scale. These two laboratory psychological tasks will be completed  
10 by each individual while alone in a quiet room, using a portable computer.

### 11 **2.5.3 Neurobiological laboratory measures**

12 **a) Brain electrical activity.** Recording of EEG activity in resting state (alternating  
13 open and closed eyes, 6 min each condition) with four EE-225 64chEEG+24chBIP  
14 16kHz devices with a laptop and eego EEG recording software. The sampling rate  
15 will be set at 1000 Hz and the reference is 7Z of the equidistant layout.

16 **b) Respiratory activity.** Respiration rate, which is related to attention training and  
17 psychological well-being [56], will be monitored by a respiration chest-band,  
18 during the EEG assessment session and will be registered using a piezoelectric  
19 sensor.

20 **c) Cardiac activity** EKG activity will be monitored with dedicated electrodes  
21 during the EEG assessment session.

22 These recordings will be completed by everyone in laboratory spaces dedicated to the  
23 EEG assessments.

#### 1            **2.5.4 Salivary sampling and cortisol measurement**

2            Participants will be given Salivette® cortisol saliva sample collection tubes (Sarstedt,  
3            Germany) that contain a sterile cotton swab for sample absorption along with detailed  
4            verbal and written instructions concerning sample collection. Diurnal Cortisol Slope and  
5            cortisol levels at bedtime and awakening will be measured at three different time points  
6            of the retreat (see Figure 1). Then, the saliva samples will be stored in the refrigerator  
7            until they are delivered to the laboratory after a few hours. Once in the laboratory, the  
8            samples will be centrifuged at 3000 rpm for 5 min, resulting in around 1.5 – 2.0 ml clear  
9            supernatant of low viscosity that will be stored at –80°C until the analyses of the salivary  
10           cortisol levels. Cortisol, the principal stress glucocorticoid produced by the  
11           hypothalamic-pituitary-adrenal axis (HPA) [57], will be assessed using a commercially  
12           available enzyme-linked immunosorbent assay (Salimetrics®) having an approximate  
13           sensitivity of <0.007 µg/dL.

#### 15           **2.6 Procedure**

16           In arriving at the retreat centre, everyone will be informed about the retreatment rules (e.g.,  
17           accommodation, silence rules, use of electronic devices, etc.) as well as his/her specific time  
18           schedules for each of the laboratory sessions. All laboratory sessions will be done on the morning of  
19           each assessment day. We will set up different laboratories for the tasks (one for blood extractions,  
20           one with nine computers to complete the self-report questionnaires, four EEG separate labs with  
21           portable equipment, and another four separate labs for the psychological tasks with one computer  
22           per room). The schedule of the assessments will be kept the same for each participant on the three  
23           assessment days. The order of the tasks will be the same for all participants (i.e., blood extraction,

1 self-report questionnaires, EEG recording, autobiographical memory task and arithmetic stress  
2 task). The expected total duration of each assessment session is approximately 90 minutes.

3

## 4 **2.7 Statistical analysis plan**

5 Repeated-measures ANOVAs will be conducted to analyse changes associated with the  
6 programs. For the autobiographical memory task and all the biological measures (i.e., genetic  
7 measures, EEG, EKG, respiratory rate, and cortisol in saliva), a 2 (Order of program) x 3 (Time)  
8 repeated measures ANOVA will be conducted. For the self-report psychological measures, a 2  
9 (Order of program) x 4 (Time) ANOVA will be conducted. We will use age, sex, and previous  
10 meditation experience as covariates in the main analyses. Assumptions of normality, homogeneity  
11 of variances, sphericity, and homogeneity of covariances will be checked. Further analyses will  
12 include post-hoc, p-corrected comparisons (e.g., Bonferroni). All analyses will be performed with  
13 SPSS or R Studio statistical software. All tests will be conducted using two-tailed tests using a  
14 standard significance value of  $p < 0.05$ .

15 The EPIC methylation arrays' raw data will be normalised and filtered by a robust  
16 bioinformatics pipeline procedure [58]. We will then perform an unsupervised analysis of the data  
17 via hierarchical clustering, i.e., PCA and t-SNE (by R Studio). In parallel, taking advantage of the  
18 known DNA methylation signatures related to distinct cell types or molecular processes, we will: 1)  
19 characterize the proportion of different immune cells; and 2) determine the epigenetic age with  
20 Horvath's model or other epigenetic clocks to capture the influence of lifestyle on the DNA  
21 methylome [59,60]. This may reveal a link between the MBI programs and the immune response,  
22 inflammation, and cells' physiological condition. Finally, we will focus on supervised analyses to



1 identify differential DNA methylation biomarkers in the two groups (MBRS first vs CCT first) and  
2 time points: day 1(baseline), day 4 (program switch), and day 7 (post retreat).

3 The EEG signals will be assessed both at the sensor level and the source's space. Source space  
4 reconstruction would be performed using the eLoreta procedure over the MNI template. The  
5 analysis will be conducted two-fold: 1) the power spectral profiles of each condition (eyes closed  
6 and eyes open) will be computed using the fast Fourier transform algorithm; 2) the functional  
7 networks will be calculated using a phase synchronization algorithm (i.e., phase locking value). The  
8 functional networks will be created using standard regions of interest defined over the AAL atlas.

9 Diurnal Cortisol Slope (DCS) will be calculated individually for each participant as a function  
10 of their respective bedtime and awakening times. DCS will be calculated as awakening cortisol  
11 subtracted from bedtime cortisol, divided by each subject's total waking hours.

12 Statistical analyses will be conducted only for data from participants who have completed pre-  
13 assessment and attended the full retreat program. Intention-to-treat (ITT) analyses will be con-  
14 ducted with all participants, regardless of session or out- come measure completion. ITT mixed  
15 models (restricted maximum likelihood (REML) estimation) will be used to account for missing  
16 data. Binary logistic regression will be used to evaluate the assumption that data is Missing at  
17 Random (MAR). To safeguard the confidentiality of participants' data, all samples will be  
18 anonymized with alpha-numeric codes. These codes will not carry any personal information.  
19 Personal data linked to the alpha-numeric code will not be included in any files used for data  
20 analyses and will remain separate from the main database. Data displayed in public repositories  
21 (e.g., GitHub or datadryad.org), linked to the resulting publications, will always be anonymized.  
22 Data supporting each published study will be included within the article and/or supporting  
23 materials. To improve blinding integrity [61], personnel who will analyse the data collected from

1 the study are not aware of the treatment applied to any given group. The authors will be fully  
2 responsible of handling and analyzing data independently from any sponsor.

3

### 4 **3. Discussion**

5 With this study, we aim to shed light on two main aspects. Firstly, we will analyse the precise  
6 interaction between psychological and psychobiological changes associated with MBSR and CCT  
7 programs. Secondly, following the rationale clinical trials that have compared the effect of the order  
8 of administration of two different modalities of interventions [62,63], we will conduct a cross-over  
9 design to explore whether it is important the order of intervention of mindfulness and compassion  
10 practices.

11 This is an ambitious study that attempts to analyze the effects of two meditation programs  
12 (MBSR and CCT) by integrating multidisciplinary perspectives. The study will offer a unique  
13 insight into the effects on epigenetic variables, using the most advanced analysis methods in the  
14 field [58]. Also, adding to current knowledge in the field [64], we aim to correlate epigenetic  
15 changes with changes in electrical brain activity and psychological variables, comparing the results  
16 before and after the interventions. Thus, we believe that this study offers a great possibility of data  
17 integration at various levels that is not common in this type of research. Furthermore, the study has  
18 been carefully designed to try to minimize potential biases that are common in meditation research  
19 [38,65]. In this regard, the study employs methods of randomization, selection of well-validated  
20 measures, and blinding of statistical analyses.

21 However, we recognize that the protocol has some limitations. Participants in mindfulness  
22 studies are typically self-selected, which is a difficult problem to control in research on meditation

1 procedures. Although the cross-over design will allow us to answer important research questions  
2 (e.g., the existence of additive effects of the two modalities), it is not certain that the results can be  
3 easily transferable to other settings. Also, the retreats include compact and intensive training that is  
4 offered in a short period of time, lacking homework exercises. However, although more time may  
5 be required to produce lasting psychobiological changes, previous studies support the idea that brief  
6 retreat interventions can detect change [35,66]. Finally, the influence of the exposure to other  
7 contingencies associated to the retreat (e.g., silence, rest days, etc.) may contribute to the changes  
8 that may be found [67–70]. We also recognize the limitation that the follow up is restricted to  
9 psychological measures only. Apart from the enormous economic cost of repeating the epigenetic  
10 measures, which we cannot afford with our limited funds, it would be impossible to achieve as the  
11 participants live in different parts of the country and were recruited only for a one-week retreat.

12 We hope that, despite these potential limitations, the results may shed light on the  
13 neurobiological and psychological mechanisms linked to meditation and compassion in the general  
14 population and may contribute to improving the scientific basis of these practices.

1  
2  
3  
4  
5  
6  
7

**Fig 1. Schematic representation of the cross-over design.**

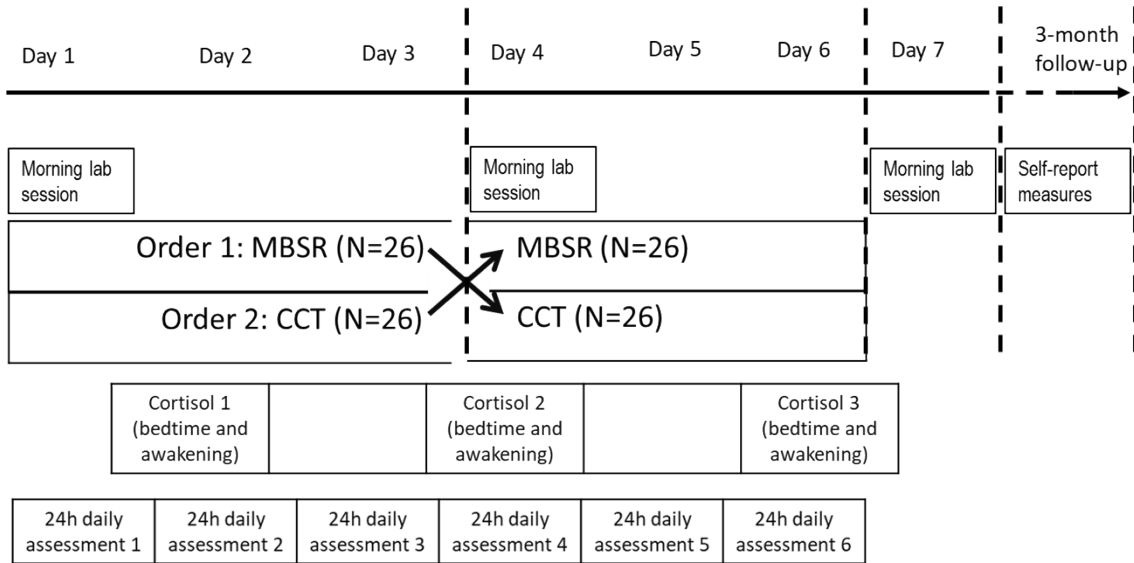

1 **Table 1. Description of the main practices of the retreat**

2

| <b>Practice</b>                                       | <b>Description</b>                                                                                                                                                                                                                                                                                  | <b>Protocol</b> | <b>Day</b> |
|-------------------------------------------------------|-----------------------------------------------------------------------------------------------------------------------------------------------------------------------------------------------------------------------------------------------------------------------------------------------------|-----------------|------------|
| <b>Basics of Mindfulness</b>                          | Practices and insights into mindfulness and acceptance. In this part, explanations are given on how to approach practices during the retreat, and how to deal with distractions, unpleasant bodily experiences, or difficult emotional states.                                                      | MBSR / CCT      | 1          |
| <b>Yoga-Qigong</b>                                    | Simple body exercises to relax tensions, unblock joint patterns and develop mindfulness in movement. In the case of CCT, references are also made to self-care and self-compassion in movement.                                                                                                     | MBSR / CCT      | 1          |
| <b>Walking meditation</b>                             | The participant is trained in the ability to be aware while walking. The movement is slower than usual. Breathing and walking movements are integrated. In the MBSR protocol, awareness of the breath and the body is encouraged. In CCT, loving-kindness or compassion is developed while walking. | MBSR / CCT      | 2          |
| <b>Body Scan</b>                                      | Attention is brought to the various parts of the body. From the soles of the feet to the top of the head. The aim is to develop mindfulness. Every time there is a distraction, the attention is gently taken up again on the sensations of the body.                                               | MBSR            | 1          |
| <b>Awareness of Breathing</b>                         | Attention is focused on breathing. Two options are given, depending on the preference of the participants (i.e., focusing attention on the tactile sensations of air in the nostrils or on the sensation of the movement of the abdomen).                                                           | MBSR            | 2          |
| <b>Awareness of Thoughts</b>                          | It aims to focus attention on the activity of the mind (i.e., on the spontaneous generation of thoughts and emotions).                                                                                                                                                                              | MBSR            | 3          |
| <b>Open Monitoring</b>                                | It is about accounting for the constant flow of subjective phenomena: cognition, perception, and emotion. Rather than choosing an object to focus attention, participants are encouraged to engage in a choiceless awareness in which subjective experience is continuously monitored.              | MBSR            | 3          |
| <b>Loving-kindness and compassion for a loved one</b> | Through visualization exercises of loved ones, practitioners are helped to recognize feelings of love whenever they arise.                                                                                                                                                                          | CCT             | 1          |

|                                     |                                                                                                                                                                                                                                        |     |   |
|-------------------------------------|----------------------------------------------------------------------------------------------------------------------------------------------------------------------------------------------------------------------------------------|-----|---|
| <b>Self-Compassion</b>              | Practising through assertions generates a feeling of self-acceptance and a desire to overcome suffering.                                                                                                                               | CCT | 2 |
| <b>Loving-kindness for one-self</b> | Meditation practices are aimed at teaching appreciation and gratitude for oneself through visualization and verbalization.                                                                                                             | CCT | 2 |
| <b>Common humanity</b>              | Through visualization practices, a sense of interconnectedness is developed (i.e., the knowledge that experiences of suffering are inherent to all human beings, as well as the pursuit of happiness).                                 | CCT | 2 |
| <b>Compassion for others</b>        | Through visualizations and verbalizations, it aims to develop compassion for others. Starting with a loved one, continuing with neutral people, and culminating with people with whom one has difficult relationships.                 | CCT | 3 |
| <b>Active compassion practice</b>   | A practice known as <i>tonglen</i> in Tibetan Buddhism, it aims to develop a sense of compassion towards others. The participant visualizes how he or she can reduce suffering in other people by doing something beneficial for them. | CCT | 3 |

1

2

3

1 **Table 2. Study procedures at specific time points**

|                                                             | Home<br>baseline<br>screening | 7-day retreat      |            |            | 3-month<br>follow-up |
|-------------------------------------------------------------|-------------------------------|--------------------|------------|------------|----------------------|
|                                                             |                               | Day<br>1st<br>(BL) | Day<br>4th | Day<br>7th |                      |
| <b><i>Epigenetic measures</i></b>                           |                               |                    |            |            |                      |
| ●DNA methylation levels                                     |                               | x                  | x          | x          |                      |
| ●Proportion of main blood cell types                        |                               | x                  | x          | x          |                      |
| ●Epigenetic clocks                                          |                               | x                  | x          | x          |                      |
| <b><i>Psychological measures (outcomes of programs)</i></b> |                               |                    |            |            |                      |
| ●Perceived Stress Scale                                     | x                             |                    |            |            |                      |
| ●Depression Anxiety Stress Scales (DASS-21)                 |                               | x                  | x          | x          | x                    |
| ●Patient Health Questionnaire (PHQ-15)                      | x                             |                    |            | x          | x                    |
| ●Patient Health Questionnaire (PHQ-9)                       | x                             |                    |            | x          | x                    |
| ●Satisfaction with life Scale (SWLS)                        | x                             |                    |            | x          | x                    |
| ●State Difficulties in Emotion Regulation (S-DERS-21)       |                               | x                  | x          | x          | x                    |
| ●State Mindfulness Scale (SMS)                              |                               | x                  | x          | x          | x                    |
| ●State Self-Compassion Scale (SSCS)                         |                               | x                  | x          | x          | x                    |
| ●Fear of Compassion (FOC)                                   |                               | x                  | x          | x          | x                    |
| ●Hedonic and Arousal Affect Scale (HAAS)                    |                               | x                  | x          | x          | x                    |
| ●Meditation-Related Adverse Effects Scale                   |                               |                    | x          | x          | x                    |
| <b><i>Psychological tasks</i></b>                           |                               |                    |            |            |                      |
| ●Arithmetic Stress Test                                     |                               | x                  | x          | x          |                      |
| ●Autobiographical memory retrieval                          |                               | x                  | x          | x          |                      |
| ●Positive and Negative Affect Schedules (PANAS - state)     |                               | x                  | x          | x          |                      |
| ●State-Trait Anxiety Inventory (STAI-20)                    |                               | x                  | x          | x          |                      |
| <b><i>Psychophysiological laboratory</i></b>                |                               |                    |            |            |                      |
| ●EEG recording (open- and closed-eyes)                      |                               | x                  | x          | x          |                      |
| ●EKG recording                                              |                               | x                  | x          | x          |                      |
| ●Respiratory rate                                           |                               | x                  | x          | x          |                      |
| <b><i>Cortisol activity</i></b>                             |                               |                    |            |            |                      |
| ●Saliva samples (bedtime and awakening)                     |                               | x                  | x          | x          |                      |

2 Note: BL = Baseline

3

4

## 1 **Acknowledgements**

2  
3 We thank Nirakara Lab's staff, Ignacio Jiménez and Claudia Caldera for their help throughout  
4 the project and all the personnel who will help us to administer the tasks and tests in our labs (Leyre  
5 Castillejo, Brenda Nadia Chino, Claudia Cogollos, Alberto del Cerro, Elena Diaz, Lucía Hernández,  
6 Marina Izquierdo, Ana Obeso, Ana Mar Pacheco, Ester Santamaria, Lucia Torres), as well as Joaquin  
7 Martinez, Head of the Hematology Department of the Hospital Universitario 12 de Octubre (Madrid,  
8 Spain) for letting us use his laboratory space, and his technicians Alicia Giménez, Laura Carneros  
9 Blanco and Lucía Sastre for their agreement to process biological samples. The support of Miguel  
10 Angel Casermeiro (Fundación General UCM) was also very valuable. Special thanks to Yago Piedra,  
11 director of the Real Colegio Maria Cristina (El Escorial, Madrid), and all his staff, for their support  
12 in preparing the retreat. We also thank Frank Zanow (ANT Neuro, Berlin, Germany) who kindly  
13 offered his help to provide technical support for the EEG recordings.

14 This research has been partially funded by a grant from Ministry of Science (PID2019-  
15 108711GB-I00) to Carmelo Vazquez, and a Spanish Ministry of Science FPI predoctoral fellowship  
16 (PRE2020-092011) to Rosaria M. Zangri. The funders did not and will not have a role in study design,  
17 data collection and analysis, decision to publish, or preparation of the manuscript.

18



## 1 References

- 2 1. Creswell JD. Mindfulness interventions. *Annu Rev Psychol.* 2017;68: 491–516. doi:10.1146/annurev-  
3 psych-042716-051139
- 4 2. Kabat-Zinn J. An outpatient program in behavioral medicine for chronic pain patients based on the  
5 practice of mindfulness meditation: Theoretical considerations and preliminary results. *Gen Hosp*  
6 *Psychiatry.* 1982;4: 33–47. doi:10.1016/0163-8343(82)90026-3
- 7 3. Goldin PR, Jazaieri H. The Compassion Cultivation Training (CCT) Program. *Oxford Handb*  
8 *Compassion Sci.* 2017;1: 1–16. doi:10.1093/oxfordhb/9780190464684.013.18
- 9 4. Jinpa GT. *Compassion Cultivation Training (CCT): Instructor’s manual.* Stanford, CA: Unpublished  
10 manuscript; 2010.
- 11 5. van Agteren J, Iasiello M, Lo L, Bartholomaeus J, Kopsaftis Z, Carey M, et al. A systematic review  
12 and meta-analysis of psychological interventions to improve mental wellbeing. *Nat Hum Behav.*  
13 2021;5: 631–652. doi:10.1038/s41562-021-01093-w
- 14 6. Goyal M, Singh S, Sibinga EMS, Gould NF, Rowland-Seymour A, Sharma R, et al. Meditation  
15 programs for psychological stress and well-being: A systematic review and meta-analysis. *JAMA*  
16 *Intern Med.* 2014;174: 357. doi:10.1001/jamainternmed.2013.13018
- 17 7. Lv J, Liu Q, Zeng X, Oei TPS, Liu Y, Xu K, et al. The effect of four Immeasurables meditations on  
18 depressive symptoms: A systematic review and meta-analysis. *Clin Psychol Rev.* 2020;76: 101814.  
19 doi:10.1016/j.cpr.2020.101814
- 20 8. Zessin U, Dickhäuser O, Garbade S. The relationship between self-compassion and well-being: A  
21 meta-analysis. *Appl Psychol Heal Well-Being.* 2015;7: 340–364. doi:10.1111/aphw.12051
- 22 9. Spijkerman MPJ, Pots WTM, Bohlmeijer ET. Effectiveness of online mindfulness-based  
23 interventions in improving mental health: A review and meta-analysis of randomised controlled trials.  
24 *Clin Psychol Rev.* The Authors; 2016;45: 102–114. doi:10.1016/j.cpr.2016.03.009
- 25 10. Schumer MC, Lindsay EK, Creswell JD. Brief mindfulness training for negative affectivity: A  
26 systematic review and meta-analysis. *J Consult Clin Psychol.* 2018;86: 569–583.  
27 doi:10.1037/ccp0000324
- 28 11. McClintock AS, Rodriguez MA, Zerubavel N. The Effects of Mindfulness Retreats on the  
29 Psychological Health of Non-clinical Adults: a Meta-analysis. *Mindfulness (N Y).* *Mindfulness;*  
30 2019;10: 1443–1454. doi:10.1007/s12671-019-01123-9
- 31 12. Blanco I, Roca P, Duque A, Pascual T, Vazquez C. The effects of a 1-month meditation retreat on  
32 selective attention towards emotional faces: An eye-tracking study. *Mindfulness (N Y).* 2020;11:  
33 219–229. doi:10.1007/s12671-019-01247-y
- 34 13. Tang Y-Y, Hölzel BK, Posner MI. The neuroscience of mindfulness meditation. *Nat Rev Neurosci.*  
35 2015;16: 1–13. doi:10.1038/nrn3916
- 36 14. Malinowski P. Neural mechanisms of attentional control in mindfulness meditation. *Front Neurosci.*  
37 2013;7. doi:10.3389/fnins.2013.00008
- 38 15. Guendelman S, Medeiros S, Rampes H. Mindfulness and emotion regulation: Insights from  
39 neurobiological, psychological, and clinical studies. *Front Psychol.* 2017;8.  
40 doi:10.3389/fpsyg.2017.00220
- 41 16. Gu J, Strauss C, Bond R, Cavanagh K. How do mindfulness-based cognitive therapy and

- 1 mindfulness-based stress reduction improve mental health and wellbeing? A systematic review and  
2 meta-analysis of mediation studies. *Clin Psychol Rev.* 2015;37: 1–12. doi:10.1016/j.cpr.2015.01.006
- 3 17. Ferrari M, Hunt C, Harrysunker A, Abbott MJ, Beath AP, Einstein DA. Self-compassion  
4 interventions and psychosocial outcomes: A meta-analysis of RCTs. *Mindfulness (N Y).*  
5 *Mindfulness*; 2019;10: 1455–1473. doi:10.1007/s12671-019-01134-6
- 6 18. Kirby JN, Tellegen CL, Steindl SR. A meta-analysis of compassion-based interventions: Current state  
7 of knowledge and future directions. *Behav Ther. Elsevier Ltd*; 2017;48: 778–792.  
8 doi:10.1016/j.beth.2017.06.003
- 9 19. Sumantry D, Stewart KE. Meditation, mindfulness, and attention: a meta-analysis. *Mindfulness (N*  
10 *Y).* *Mindfulness*; 2021;12: 1332–1349. doi:10.1007/s12671-021-01593-w
- 11 20. MacBeth A, Gumley A. Exploring compassion: A meta-analysis of the association between self-  
12 compassion and psychopathology. *Clin Psychol Rev. Institute of Health and Wellbeing, University of*  
13 *Glasgow, Glasgow, Scotland angus.macbeth@nhs.net; MacBeth, Angus,1055 Great Western*  
14 *Road,Glasgow,Scotland,G12 0XH,Institute of Health and Wellbeing, Mental Health and Wellbeing*  
15 *Research Group, Academic Cent: Elsevier Science*; 2012;32: 545–552.
- 16 21. Wilson AC, Mackintosh K, Power K, Chan SWY. Effectiveness of self-compassion related therapies:  
17 A systematic review and meta-analysis. *Mindfulness (N Y).* *Mindfulness*; 2019;10: 979–995.  
18 doi:10.1007/s12671-018-1037-6
- 19 22. Roca P, Diez GG, Castellanos N, Vazquez C. Does mindfulness change the mind? A novel  
20 psychonectome perspective based on Network Analysis. Sendiña-Nadal I, editor. *PLoS One.* 2019;14:  
21 e0219793. doi:10.1371/journal.pone.0219793
- 22 23. Roca P, Vazquez C. Brief meditation trainings improve performance in the emotional Attentional  
23 Blink. *Mindfulness (N Y).* *Mindfulness*; 2020;11: 1613–1622. doi:10.1007/s12671-020-01374-x
- 24 24. Roca P, Vazquez C, Diez G, Brito-Pons G, McNally RJ. Not all types of meditation are the same:  
25 Mediators of change in mindfulness and compassion meditation interventions. *J Affect Disord.*  
26 *Elsevier B.V.*; 2021;283: 354–362. doi:10.1016/j.jad.2021.01.070
- 27 25. Pascoe MC, Thompson DR, Jenkins ZM, Ski CF. Mindfulness mediates the physiological markers of  
28 stress: Systematic review and meta-analysis. *J Psychiatr Res. Elsevier Ltd*; 2017;95: 156–178.  
29 doi:10.1016/j.jpsychires.2017.08.004
- 30 26. Dossett ML, Fricchione GL, Benson H. A new era for mind–body medicine. *N Engl J Med.*  
31 2020;382: 1390–1391. doi:10.1056/NEJMp1917461
- 32 27. Gardi C, Fazia T, Stringa B, Giommi F. A short mindfulness retreat can improve biological markers  
33 of stress and inflammation. *Psychoneuroendocrinology. Elsevier Ltd*; 2022;135: 105579.  
34 doi:10.1016/j.psyneuen.2021.105579
- 35 28. Kral TRA, Davis K, Korponay C, Hirshberg MJ, Hoel R, Tello LY, et al. Absence of structural brain  
36 changes from mindfulness-based stress reduction: Two combined randomized controlled trials. *Sci*  
37 *Adv.* 2022;8: 2021.06.14.21258762. doi:10.1126/sciadv.abk3316
- 38 29. Rahrig H, Vago DR, Passarelli M, Auten A, Lynn NA, Brown KW. Disrupting the resting state:  
39 Meta-analytic evidence that mindfulness training alters default mode network connectivity. *Res Sq -*  
40 *preprints.* 2022; 1–21. doi:10.21203/rs.3.rs-1189676/v1
- 41 30. Sezer I, Pizzagalli DA, Sacchet MD. Resting-state fMRI functional connectivity and mindfulness in  
42 clinical and non-clinical contexts: A review and synthesis. *Neurosci Biobehav Rev.* 2022;135:  
43 104583. doi:10.1016/j.neubiorev.2022.104583

- 1 31. Chandran V, Bermudez ML, Koka M, Chandran B, Pawale D, Vishnubhotla R, et al. Large-scale  
2 genomic study reveals robust activation of the immune system following advanced Inner Engineering  
3 meditation retreat. *Proc Natl Acad Sci U S A*. 2021;118. doi:10.1073/pnas.2110455118
- 4 32. Álvarez-López MJ, Conklin QA, Cosín-Tomás M, Shields GS, King BG, Zanesco AP, et al. Changes  
5 in the expression of inflammatory and epigenetic-modulatory genes after an intensive meditation  
6 retreat. *Compr Psychoneuroendocrinology*. 2022;11: 100152. doi:10.1016/j.cpnec.2022.100152
- 7 33. Conklin QA, King BG, Zanesco AP, Lin J, Hamidi AB, Pokorny JJ, et al. Insight meditation and  
8 telomere biology: The effects of intensive retreat and the moderating role of personality. *Brain Behav*  
9 *Immun*. The Authors; 2018;70: 233–245. doi:10.1016/j.bbi.2018.03.003
- 10 34. Conklin QA, Crosswell AD, Saron CD, Epel ES. Meditation, stress processes, and telomere biology.  
11 *Curr Opin Psychol*. Elsevier Ltd; 2019;28: 92–101. doi:10.1016/j.copsyc.2018.11.009
- 12 35. Chaix R, Fagny M, Cosin-Tomás M, Alvarez-López M, Lemee L, Regnault B, et al. Differential  
13 DNA methylation in experienced meditators after an intensive day of mindfulness-based practice:  
14 Implications for immune-related pathways. *Brain Behav Immun*. Elsevier; 2020;84: 36–44.  
15 doi:10.1016/j.bbi.2019.11.003
- 16 36. Kaliman P, Álvarez-López MJ, Cosín-Tomás M, Rosenkranz MA, Lutz A, Davidson RJ. Rapid  
17 changes in histone deacetylases and inflammatory gene expression in expert meditators.  
18 *Psychoneuroendocrinology*. 2014;40: 96–107. doi:10.1016/j.psyneuen.2013.11.004
- 19 37. Goldberg SB, Tucker RP. Allegiance effects in mindfulness-based interventions for psychiatric  
20 disorders: A meta-re-analysis. *Psychother Res*. 2019; 1–10. doi:10.1080/10503307.2019.1664783
- 21 38. Davidson RJ, Dahl CJ. Outstanding challenges in scientific research on mindfulness and meditation.  
22 *Perspect Psychol Sci*. 2018;13: 62–65. doi:10.1177/1745691617718358
- 23 39. Van Dam NT, van Vugt MK, Vago DR, Schmalzl L, Saron CD, Olendzki A, et al. Reiterated  
24 concerns and further challenges for mindfulness and meditation research: A reply to Davidson and  
25 Dahl. *Perspect Psychol Sci*. 2018;13: 66–69. doi:10.1177/1745691617727529
- 26 40. Kabat-Zinn J. Full catastrophe living: Using the wisdom of your body and mind to face stress, pain,  
27 and illness. New York: Delta; 1990.
- 28 41. Brito-Pons G, Waibel A, Rosenberg E, Chun JM. Compassion Cultivation Training (CCT): Program  
29 description, research, and potential benefit for health care and palliative care professionals. *The*  
30 *Power of Compassion*. 2019; 133–157.
- 31 42. Lovibond PF, Lovibond SH. The structure of negative emotional states: Comparison of the  
32 Depression Anxiety Stress Scales (DASS) with the Beck Depression and Anxiety Inventories. *Behav*  
33 *Res Ther*. 1995;33: 335–343. doi:10.1016/0005-7967(94)00075-U
- 34 43. Diener E, Emmons RA, Larsen RJ, Griffin S. The Satisfaction With Life Scale. *J Pers Assess*.  
35 1985;49: 71–75.
- 36 44. Tanay G, Bernstein A. State Mindfulness Scale (SMS): Development and initial validation. *Psychol*  
37 *Assess*. 2013;25: 1286–1299. doi:10.1037/a0034044
- 38 45. Kroenke K, Spitzer RL, Williams JBW. The PHQ-15: Validity of a new measure for evaluating the  
39 severity of somatic symptoms. *Psychosom Med*. 2002;64: 258–266. doi:10.1097/00006842-  
40 200203000-00008
- 41 46. American Psychiatric Association. Diagnostic and Statistical Manual of Mental Disorders (DSM-5),  
42 5th ed. Washington, DC: American Psychiatric Publishing; 2013.

- 1           doi:10.1176/appi.books.9780890425596
- 2   47.   Neff KD, Tóth-Király I, Knox MC, Kuchar A, Davidson O. The development and validation of the  
3   State Self-Compassion Scale (Long- and Short Form). *Mindfulness* (N Y). 2021;12: 121–140.  
4   doi:10.1007/s12671-020-01505-4
- 5   48.   Gilbert P, McEwan K, Matos M, Ravis A. Fears of compassion: Development of three self-report  
6   measures. *Psychol Psychother Theory, Res Pract*. 2011;84: 239–255.  
7   doi:10.1348/147608310X526511
- 8   49.   Lavender JM, Tull MT, DiLillo D, Messman-Moore T, Gratz KL. Development and validation of a  
9   state-based measure of emotion dysregulation. *Assessment*. 2017;24: 197–209.  
10   doi:10.1177/1073191115601218
- 11   50.   Watson D, Clark LA, Tellegen A. Development and validation of brief measures of positive and  
12   negative affect: The PANAS scales. *J Pers Soc Psychol*. 1988;54: 1063–1070. doi:10.1037//0022-  
13   3514.54.6.1063
- 14   51.   Roca P, Ondé D, Vazquez C. The Hedonic and Arousal Affect Scale (HAAS): A brief adjective  
15   checklist to assess affect states. *Manuscr under Rev*. 2022;
- 16   52.   Britton WB, Lindahl JR, Cooper DJ, Canby NK, Palitsky R. Defining and measuring meditation-  
17   related adverse effects in mindfulness-based programs. *Clin Psychol Sci*. 2021;9: 1185–1204.  
18   doi:10.1177/2167702621996340
- 19   53.   Attkisson CC, Zwick R. The client satisfaction questionnaire. *Eval Program Plann*. 1982;5: 233–237.  
20   doi:10.1016/0149-7189(82)90074-X
- 21   54.   Narvaez Linares NF, Charron V, Ouimet AJ, Labelle PR, Plamondon H. A systematic review of the  
22   Trier Social Stress Test methodology: Issues in promoting study comparison and replicable research.  
23   *Neurobiol Stress*. Elsevier Inc.; 2020;13: 100235. doi:10.1016/j.ynstr.2020.100235
- 24   55.   Watford TS, O’Brien WH, Koerten HR, Bogusch LM, Moeller MT, Sonia Singh R, et al. The  
25   mindful attention and awareness scale is associated with lower levels of high-frequency heart rate  
26   variability in a laboratory context. *Psychophysiology*. 2020;57. doi:10.1111/psyp.13506
- 27   56.   Wielgosz J, Schuyler BS, Lutz A, Davidson RJ. Long-term mindfulness training is associated with  
28   reliable differences in resting respiration rate. *Sci Rep*. 2016;6: 27533. doi:10.1038/srep27533
- 29   57.   Hellhammer DH, Wüst S, Kudielka BM. Salivary cortisol as a biomarker in stress research.  
30   *Psychoneuroendocrinology*. 2009;34: 163–171. doi:10.1016/j.psyneuen.2008.10.026
- 31   58.   Duran-Ferrer M, Clot G, Nadeu F, Beekman R, Baumann T, Nordlund J, et al. The proliferative  
32   history shapes the DNA methylome of B-cell tumors and predicts clinical outcome. *Nat Cancer*.  
33   2020;1: 1066–1081. doi:10.1038/s43018-020-00131-2
- 34   59.   Horvath S. DNA methylation age of human tissues and cell types. *Genome Biol*. 2013;14: R115.  
35   doi:10.1186/gb-2013-14-10-r115
- 36   60.   Oblak L, van der Zaag J, Higgins-Chen AT, Levine ME, Boks MP. A systematic review of biological,  
37   social and environmental factors associated with epigenetic clock acceleration. *Ageing Res Rev*.  
38   2021;69: 101348. doi:10.1016/j.arr.2021.101348
- 39   61.   Mataix-Cols D, Andersson E. Ten practical recommendations for improving blinding integrity and  
40   reporting in psychotherapy trials. *JAMA Psychiatry*. 2021;78: 943.  
41   doi:10.1001/jamapsychiatry.2021.1419

- 1 62. Geschwind N, Arntz A, Bannink F, Peeters F. Positive cognitive behavior therapy in the treatment of  
2 depression: A randomized order within-subject comparison with traditional cognitive behavior  
3 therapy. *Behav Res Ther.* Elsevier; 2019;116: 119–130. doi:10.1016/j.brat.2019.03.005
- 4 63. Guidi J, Fava GA. Sequential combination of pharmacotherapy and psychotherapy in major  
5 depressive disorder. *JAMA Psychiatry.* 2021;78: 261. doi:10.1001/jamapsychiatry.2020.3650
- 6 64. Kaliman P. Epigenetics and meditation. *Curr Opin Psychol.* Elsevier Ltd; 2019;28: 76–80.  
7 doi:10.1016/j.copsyc.2018.11.010
- 8 65. Van Dam NT, van Vugt MK, Vago DR, Schmalzl L, Saron CD, Olendzki A, et al. Mind the hype: A  
9 critical evaluation and prescriptive agenda for research on mindfulness and meditation. *Perspect*  
10 *Psychol Sci.* 2018;13: 36–61. doi:10.1177/1745691617709589
- 11 66. Kaliman P, Cosín-Tomás M, Madrid A, Roque López S, Llanez-Anaya E, Papale LA, et al.  
12 Epigenetic impact of a 1-week intensive multimodal group program for adolescents with multiple  
13 adverse childhood experiences. *Sci Rep.* Nature Publishing Group UK; 2022;12: 1–16.  
14 doi:10.1038/s41598-022-21246-9
- 15 67. King BG, Conklin QA, Zanesco AP, Saron CD. Residential meditation retreats : their role in  
16 contemplative practice and significance for psychological research. *Curr Opin Psychol.* Elsevier Ltd;  
17 2019;28: 238–244. doi:10.1016/j.copsyc.2018.12.021
- 18 68. Epel ES, Puterman E, Lin J, Blackburn EH, Lum PY, Beckmann ND, et al. Meditation and vacation  
19 effects have an impact on disease-associated molecular phenotypes. *Transl Psychiatry.* Nature  
20 Publishing Group; 2016;6: e880. doi:10.1038/tp.2016.164
- 21 69. Norman A, Pokorny JJ. Meditation retreats: Spiritual tourism well-being interventions. *Tour Manag*  
22 *Perspect.* Elsevier Ltd; 2017;24: 201–207. doi:10.1016/j.tmp.2017.07.012
- 23 70. Blasche G, DeBloom J, Chang A, Pichlhoefer O. Is a meditation retreat the better vacation? effect of  
24 retreats and vacations on fatigue, emotional well-being, and acting with awareness. *PLoS One.*  
25 2021;16: 1–19. doi:10.1371/journal.pone.0246038
